# Supplementary material for: Lactobacillus bile salt hydrolase substrate specificity governs bacterial fitness and host colonization
Source: PubMed Central journal article supplement — Proc Natl Acad Sci U S A. 2021 Feb 1;118(6):e2017709118. doi: 10.1073/pnas.2017709118 (PMC8017965; doi:10.1073/pnas.2017709118), 2021-02-01
Supplement: pnas.2017709118.sapp.pdf [file pnas.2017709118.sapp.pdf]

# PNAS

[www.pnas.org](http://www.pnas.org)

Supplementary Information for

*Lactobacillus* Bile Salt Hydrolase Substrate Specificity Governs Bacterial Fitness and Host Colonization

Matthew H. Foley<sup>1</sup>, Sarah O'Flaherty<sup>2</sup>, Garrison Allen<sup>1</sup>, Alissa J. Rivera<sup>1</sup>, Allison K. Stewart<sup>3</sup>, Rodolphe Barrangou<sup>2\*</sup>, Casey M. Theriot<sup>1\*</sup>.

Rodolphe Barrangou & Casey M. Theriot  
Email: [rbarran@ncsu.edu](mailto:rbarran@ncsu.edu) & [cmtherio@ncsu.edu](mailto:cmtherio@ncsu.edu)

**This PDF file includes:**

Figures S1 to S11  
Tables S1 to S3

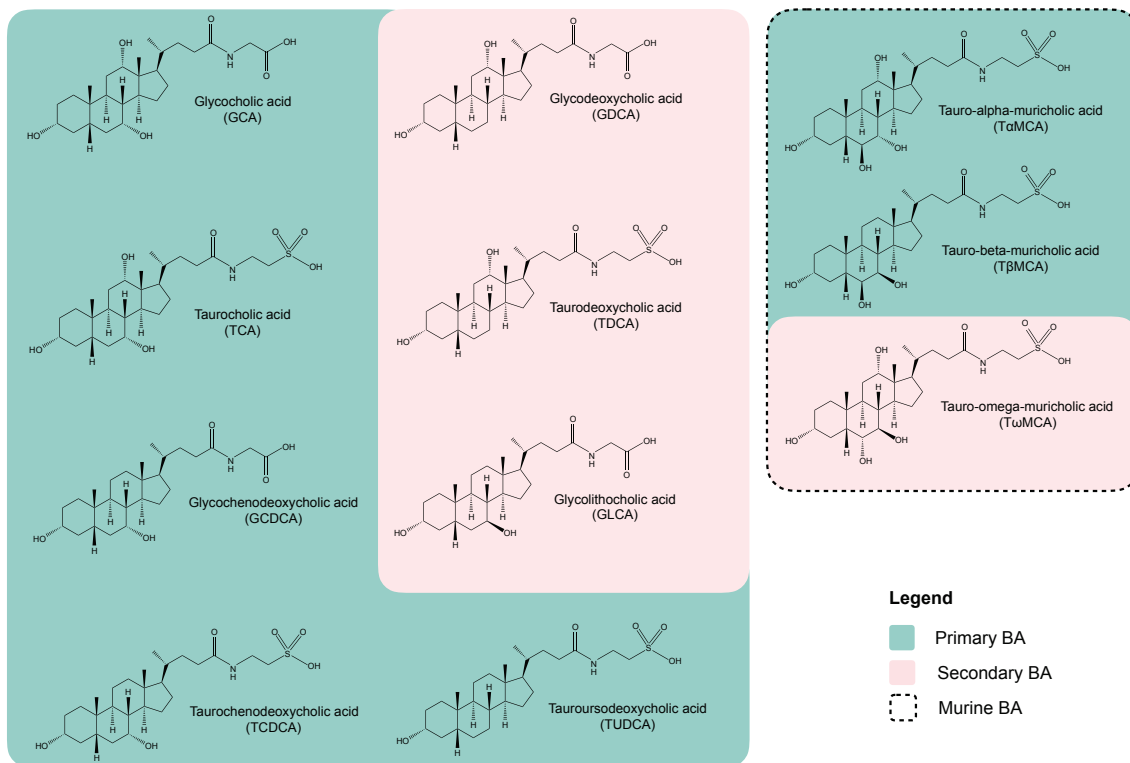

**Fig. S1. Bile acid structures and abbreviations referenced in this study.**

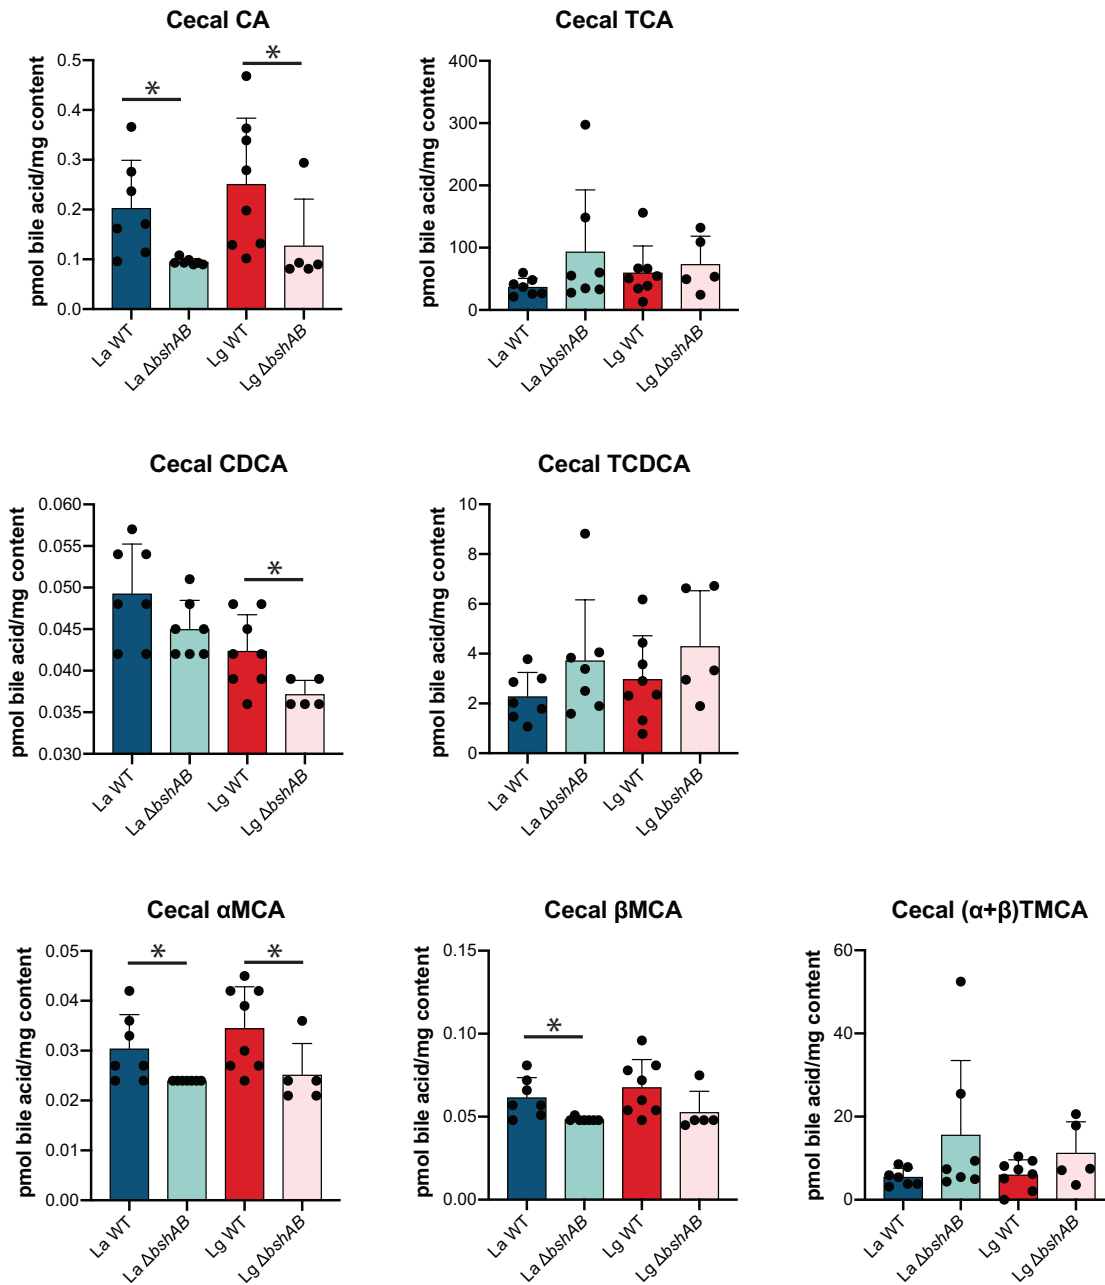

**Fig. S2. Targeted bile acid metabolomics of *Lactobacillus*-associated mice cecum.** Cecal BA concentrations from germ free C57BL/6J mice colonized with WT (n=7) or  $\Delta bshAB$  (n=7) *L. acidophilus*, and WT (n=8) or  $\Delta bshAB$  (n=5) *L. gasseri*. Asterisks represent significant ( $p < 0.05$ ) differences between groups by Mann-Whitney test.

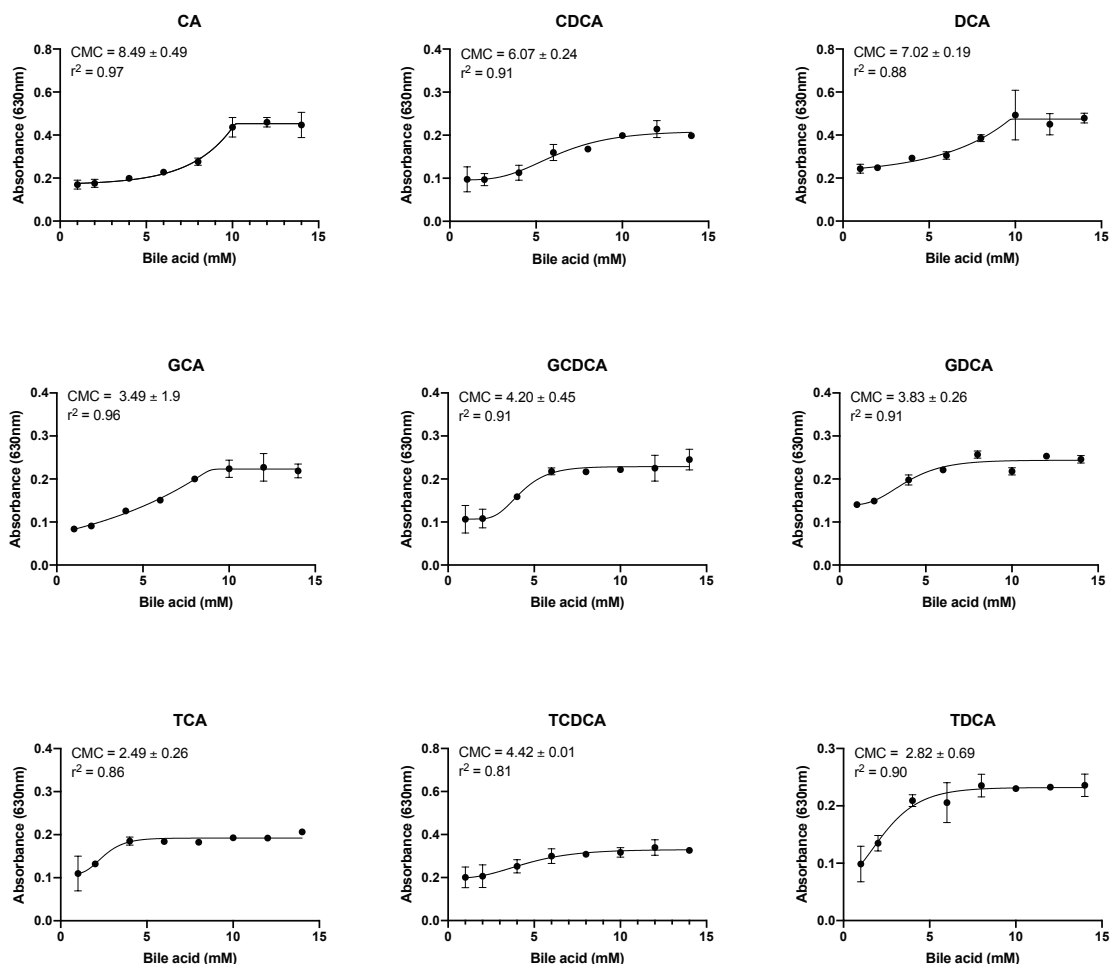

**Fig. S3. Critical Micelle Concentrations (CMCs) of bile acids used in this study.** CMCs were determined using Optimizer-BlueBALLS. Absorbance data from two independent experiments was plotted against BA concentrations for each molecule. A standard five-parameter logistic curve fit was performed using Graphpad Prism, and the CMC was determined by calculating the inflection point of each curve represented by the  $\text{Log}_{10}\text{EC}_{50}$ . Inflection point values represent mean  $\pm$  s.e.m n=2 replicates.

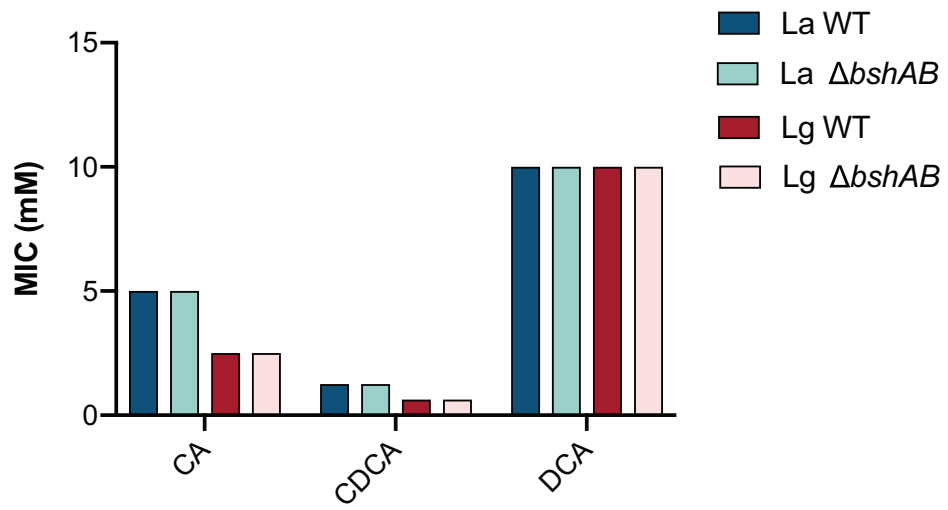

**Fig. S4. WT and  $\Delta bshAB$  deconjugated bile acid MICs.** Bars represent mean MICs from n=3 independent experiments. MICs did not vary between experiments.

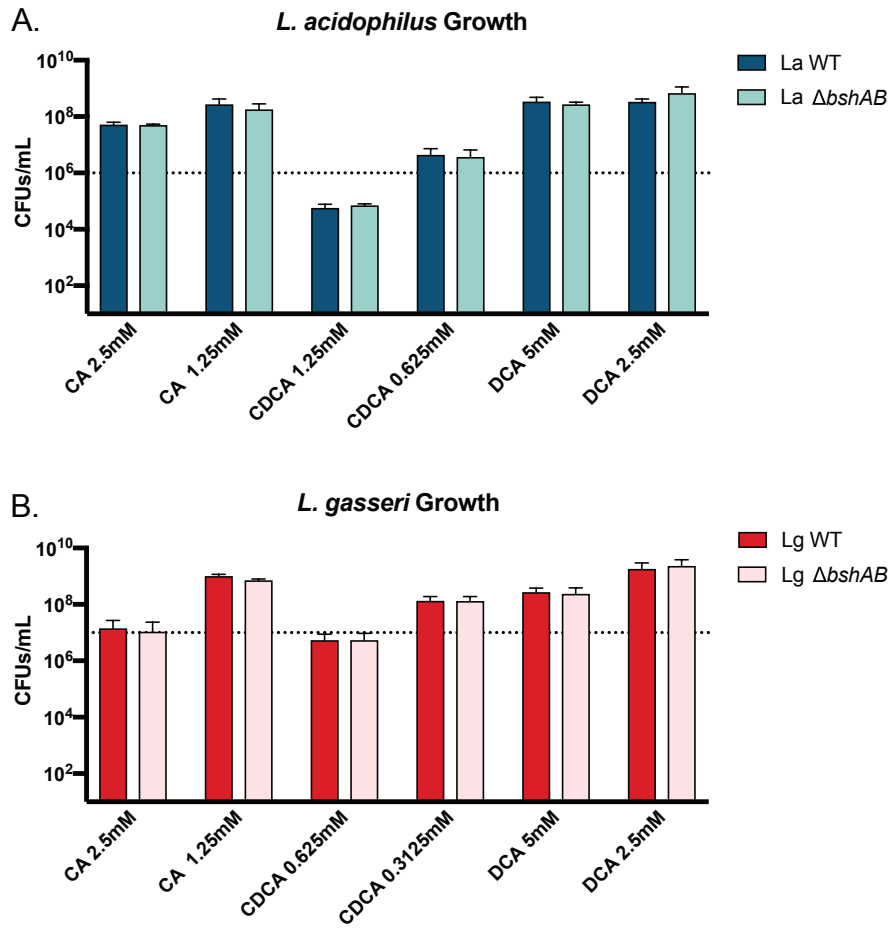

**Fig. S5. BSH activity does not affect growth in the presence of deconjugated bile acids.** (A) *L. acidophilus* and (B) *L. gasseri* WT and  $\Delta bshAB$  strains grown with CA, CDCA, and DCA. Bars represent mean CFUs and error bars represent s.d. from n=4 independent experiments. Dashed lined denotes the approximate starting CFUs/mL at 0h.

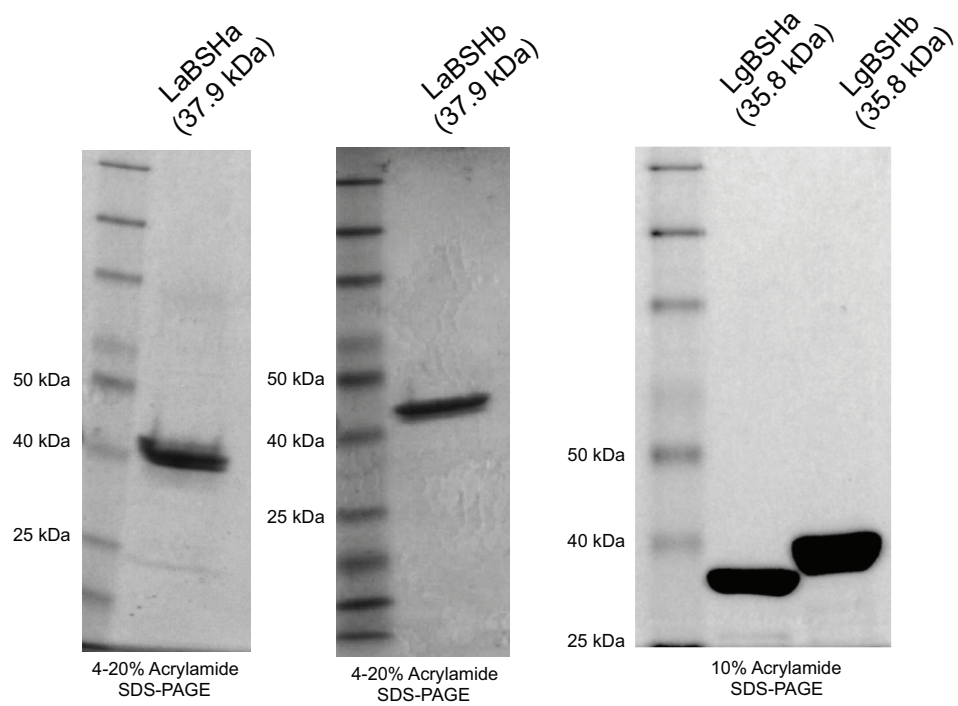

**Fig. S6. SDS-PAGE of purified *Lactobacillus* BSHs.** Molecular weights for each protein are labeled at the top of each gel.

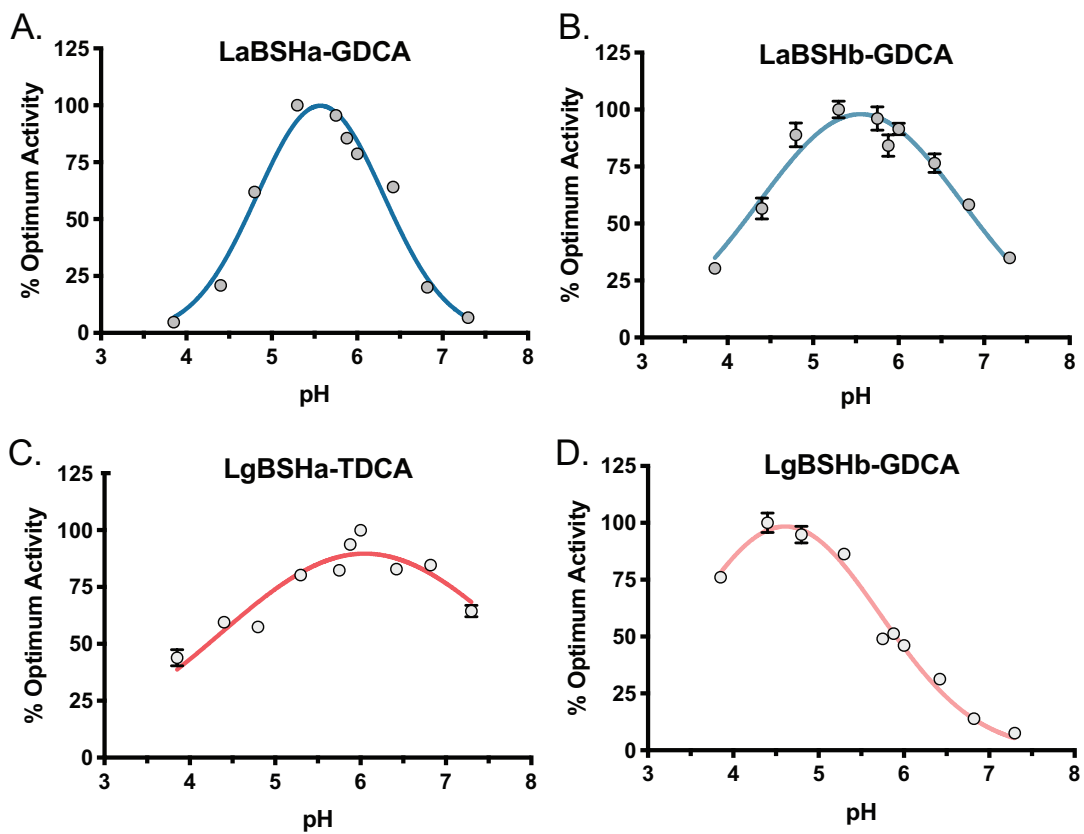

**Fig. S7. pH optima of *Lactobacillus* BSH.** Buffer conditions ranging from pH 3.5–7.5 were assayed with each BSH using the substrate with highest activity. Citrate buffer was used to buffer pHs >6 and phosphate was used to buffer pHs <6. Error bars represent s.d.



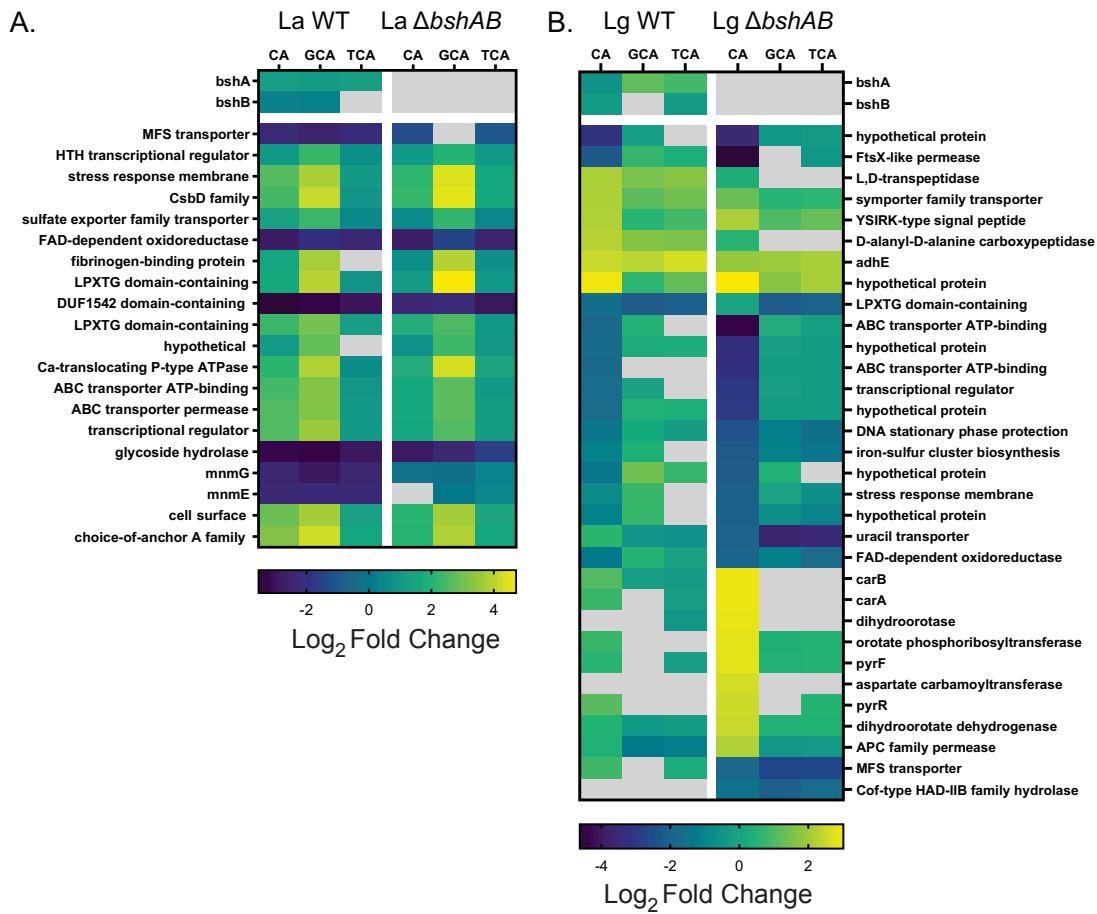

**Fig. S8. Heatmap of differential gene expression during growth with various bile acids** (A,B) Differential expression for each gene in response to CA, GCA, and TCA. The scale represents Log<sub>2</sub> ratios and exact values are shown in Table S1. In addition, the Log<sub>2</sub> ratios for each of the *bsh* genes is shown at the top of the heat map. The gray color cells indicate no significant differential expression.

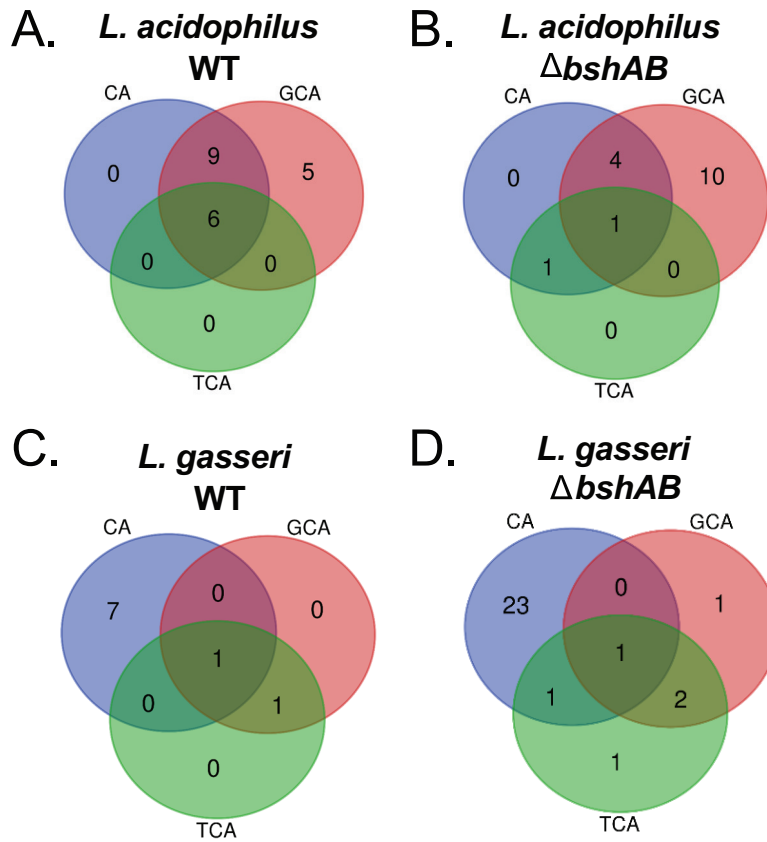

**Fig. S9. Venn diagram summary of differential gene expression.** Venn diagrams showing the number of genes and the common genes differentially expressed under growth in each condition (CA, GCA or TCA compared to MRS medium for (A) *L. acidophilus* NCK1909 (WT) and *L. acidophilus* NCK2523 ( $\Delta bshAB$ ), (B) *L. gasseri* NCK2253 (WT) and *L. gasseri* NCK2680 ( $\Delta bshAB$ ). For the Venn diagram genes have a Log2 ratio  $\leq -2$  or  $\geq 2$  and a p value  $< 0.05$  and gene details are found in Table S1.

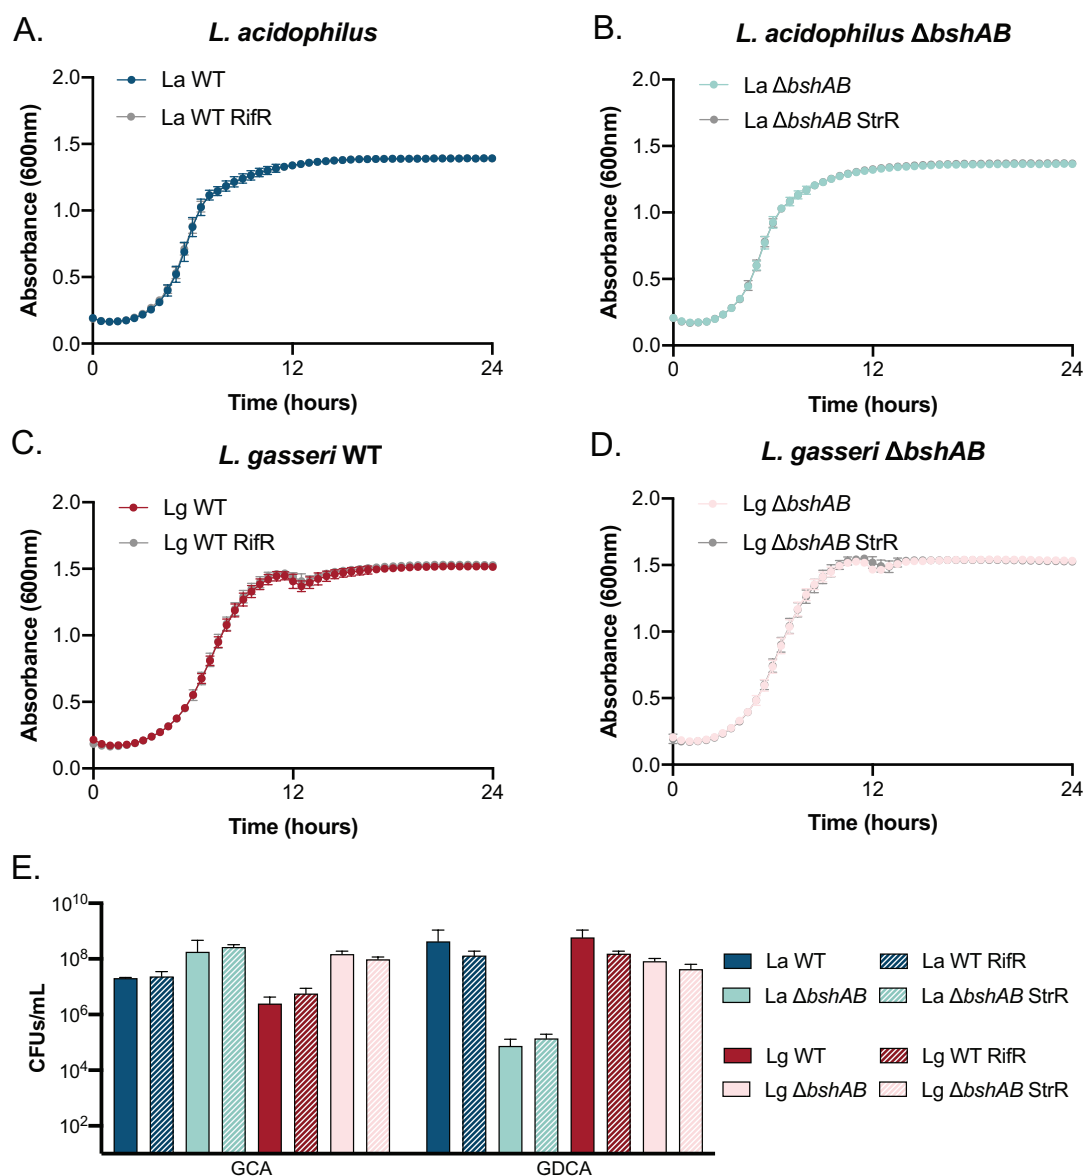

**Fig. S10. Rifampicin and streptomycin-resistant strains are phenotypically similar to their isogenic parent strains.** Spontaneous rifampicin resistance mutants (RifR) of (A) WT *L. acidophilus* or (C) WT *L. gasseri* and streptomycin resistance mutants (StrR) of (B)  $\Delta bshAB$  *L. acidophilus* or (D)  $\Delta bshAB$  *L. gasseri* were selected for by plating  $\sim 10^{10}$  bacteria on MRS agar containing 100  $\mu\text{g}/\text{mL}$  rifampicin and 500  $\mu\text{g}/\text{mL}$  streptomycin, respectively. Growths were carried out in MRS media in an anaerobic plate reader in replicate  $n=5$ . (E). *L. acidophilus* and *L. gasseri* spontaneous antibiotic-resistant mutants grown for 24 h in 5 mM GCA or 2.5 mM GDCA. Error bars represent s.d. from  $n=3$  independent experiments.

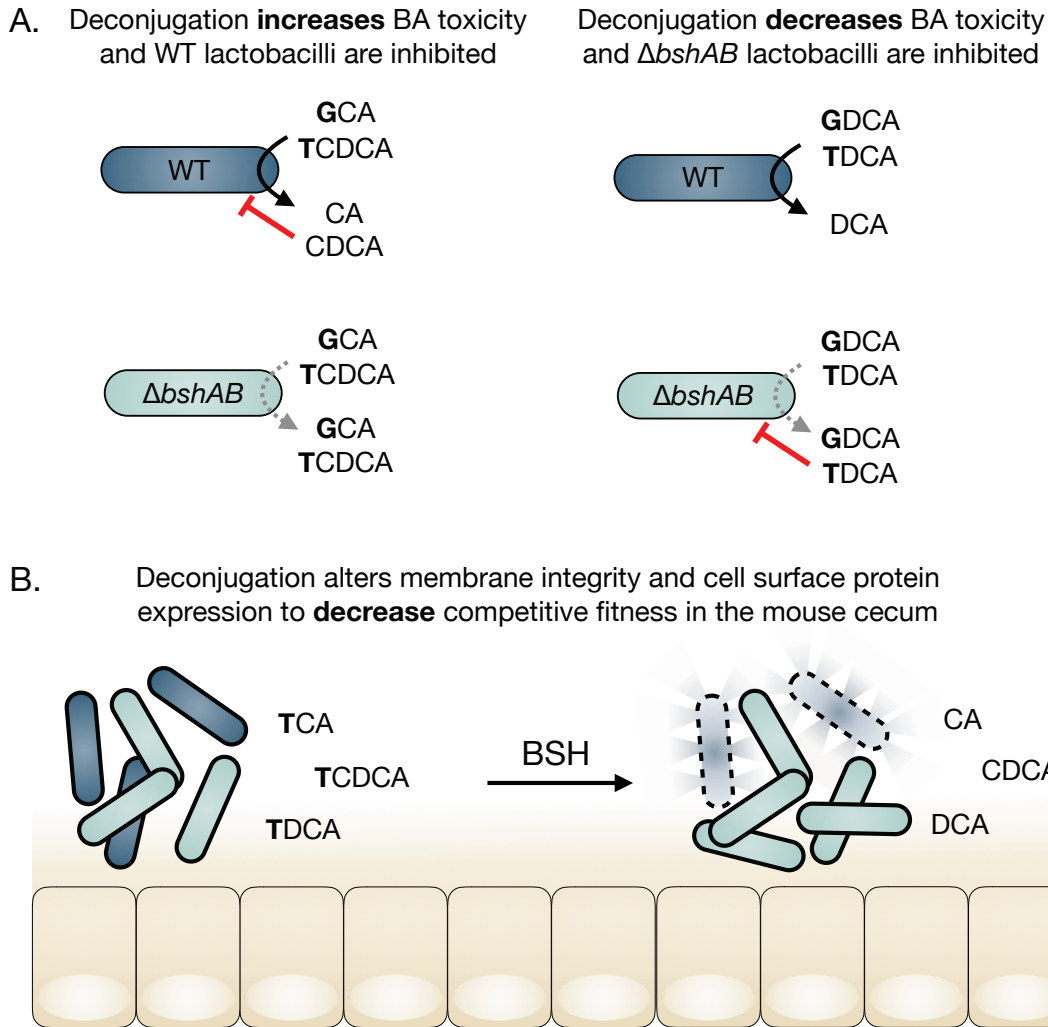

**Fig. S11. Model of BSH-governed *Lactobacillus* fitness and colonization.** *L. acidophilus* is depicted here as a representative *Lactobacillus* species. (A) On the left, our *in vitro* experiments demonstrate how WT *L. acidophilus* (portrayed as dark blue) can generate deconjugated BAs that are more toxic than their conjugated forms, resulting in growth inhibition.  $\Delta bshAB$  (portrayed as light blue) cannot deconjugate these BAs thereby limiting exposure to toxic deconjugated BAs. On the right, we also demonstrate how WT *L. acidophilus* can generate deconjugated BAs that are less toxic than their conjugated forms.  $\Delta bshAB$  cannot deconjugate these BAs thereby resulting in growth inhibition. The toxicity of a given conjugated/deconjugated BA is species-specific and deconjugation is dependent on the substrate preferences of the BSH. (B) *in/ex vivo* competitions demonstrate that  $\Delta bshAB$  is more competitive than WT when exposed to the murine cecal BA pool. Deconjugated BAs in this niche may be more toxic to *Lactobacillus*, explaining why BSH activity is detrimental. Additionally, deconjugated BA exposure may alter the membrane integrity and transcriptome of *Lactobacillus in vivo* differently based on the expression of a BSH, and we hypothesize that these changes can also govern competitive fitness.

**L. acidophilus wild type**

**CA V MRS**

| locus_tag   | Name                                                       | DE Log2 Ratio | DE p-value |
|-------------|------------------------------------------------------------|---------------|------------|
| LBA_RS07885 | DUF1542 domain-containing protein CDS                      | -3.53         | 0          |
| LBA_RS09100 | glycoside hydrolase family 65 protein CDS                  | -3.28         | 1.00E-250  |
| LBA_RS06090 | FAD-dependent oxidoreductase CDS                           | -2.83         | 2.50E-256  |
| LBA_RS09595 | mnmG CDS                                                   | -2.52         | 0          |
| LBA_RS09600 | mnmE CDS                                                   | -2.44         | 0          |
| LBA_RS00225 | SLC45 family MFS transporter CDS                           | -2.38         | 8.27E-58   |
| LBA_RS08260 | calcium-translocating P-type ATPase, PMCA-type CDS         | 2.03          | 9.28E-292  |
| LBA_RS08110 | LPXTG cell wall anchor domain-containing protein CDS       | 2.22          | 8.65E-182  |
| LBA_RS08960 | ABC transporter ATP-binding protein CDS                    | 2.30          | 0          |
| LBA_RS04455 | CsbD family protein CDS                                    | 2.34          | 0          |
| LBA_RS08970 | TetR/AcrR family transcriptional regulator CDS             | 2.44          | 1.73E-239  |
| LBA_RS08965 | ABC transporter permease CDS                               | 2.48          | 0          |
| LBA_RS04450 | GlsB/YeaQ/YmgE family stress response membrane protein CDS | 2.54          | 0          |
| LBA_RS09685 | cell surface protein CDS                                   | 2.80          | 1.30E-52   |
| LBA_RS09690 | choice-of-anchor A family protein CDS                      | 3.12          | 3.60E-68   |

**Venn Diagram**

| Names      | total | locus_tag   |
|------------|-------|-------------|
| CA GCA TCA | 6     | LBA_RS09100 |
|            |       | LBA_RS09595 |
|            |       | LBA_RS06090 |
|            |       | LBA_RS09600 |
|            |       | LBA_RS00225 |
|            |       | LBA_RS07885 |
| CA GCA     | 9     | LBA_RS08970 |
|            |       | LBA_RS04455 |
|            |       | LBA_RS08960 |
|            |       | LBA_RS09685 |
|            |       | LBA_RS08260 |
|            |       | LBA_RS08110 |
|            |       | LBA_RS08965 |
|            |       | LBA_RS09690 |
|            |       | LBA_RS04450 |
| GCA        | 5     | LBA_RS08125 |
|            |       | LBA_RS07330 |
|            |       | LBA_RS05625 |
|            |       | LBA_RS07335 |
|            |       | LBA_RS04415 |

**GCA V MRS**

| locus_tag   | Name                                                       | DE Log2 Ratio | DE p-value |
|-------------|------------------------------------------------------------|---------------|------------|
| LBA_RS09100 | glycoside hydrolase family 65 protein CDS                  | -3.41         | 7.44E-249  |
| LBA_RS07885 | DUF1542 domain-containing protein CDS                      | -3.37         | 0          |
| LBA_RS09595 | mnmG CDS                                                   | -2.92         | 0          |
| LBA_RS00225 | SLC45 family MFS transporter CDS                           | -2.69         | 6.87E-71   |
| LBA_RS09600 | mnmE CDS                                                   | -2.41         | 1.67E-263  |
| LBA_RS06090 | FAD-dependent oxidoreductase CDS                           | -2.05         | 9.75E-147  |
| LBA_RS04415 | helix-turn-helix transcriptional regulator CDS             | 2.20          | 5.02E-21   |
| LBA_RS05625 | putative sulfate exporter family transporter CDS           | 2.21          | 1.35E-144  |
| LBA_RS08125 | hypothetical protein CDS                                   | 2.71          | 5.23E-25   |
| LBA_RS08110 | LPXTG cell wall anchor domain-containing protein CDS       | 2.97          | 0          |
| LBA_RS08960 | ABC transporter ATP-binding protein CDS                    | 3.14          | 0          |
| LBA_RS08965 | ABC transporter permease CDS                               | 3.16          | 0          |
| LBA_RS08970 | TetR/AcrR family transcriptional regulator CDS             | 3.48          | 0          |
| LBA_RS09685 | cell surface protein CDS                                   | 3.61          | 8.10E-104  |
| LBA_RS07330 | fibrinogen-binding protein CDS                             | 3.63          | 2.02E-48   |
| LBA_RS04450 | GlsB/YeaQ/YmgE family stress response membrane protein CDS | 3.67          | 0          |
| LBA_RS08260 | calcium-translocating P-type ATPase, PMCA-type CDS         | 3.76          | 0          |
| LBA_RS07335 | LPXTG cell wall anchor domain-containing protein CDS       | 3.85          | 2.16E-237  |
| LBA_RS04455 | CsbD family protein CDS                                    | 4.05          | 0          |
| LBA_RS09690 | choice-of-anchor A family protein CDS                      | 4.15          | 6.90E-146  |

**TCA V MRS**

| locus_tag   | Name                                      | DE Log2 Ratio | DE p-value |
|-------------|-------------------------------------------|---------------|------------|
| LBA_RS07885 | DUF1542 domain-containing protein CDS     | -3.06         | 0          |
| LBA_RS09100 | glycoside hydrolase family 65 protein CDS | -2.93         | 4.35E-58   |
| LBA_RS06090 | FAD-dependent oxidoreductase CDS          | -2.52         | 5.51E-238  |
| LBA_RS09595 | mnmG CDS                                  | -2.51         | 0          |
| LBA_RS09600 | mnmE CDS                                  | -2.41         | 0          |
| LBA_RS00225 | SLC45 family MFS transporter CDS          | -2.31         | 4.72E-61   |

**L. acidophilus ΔbshAB**

**CA V MRS**

| locus_tag   | Name                                                       | DE Log2 Ratio | DE p-value |
|-------------|------------------------------------------------------------|---------------|------------|
| LBA_RS09100 | glycoside hydrolase family 65 protein CDS                  | -2.91         | 1.08E-182  |
| LBA_RS06090 | FAD-dependent oxidoreductase CDS                           | -2.78         | 6.00E-273  |
| LBA_RS07885 | DUF1542 domain-containing protein CDS                      | -2.47         | 0          |
| LBA_RS09685 | cell surface protein CDS                                   | 2.01          | 1.73E-28   |
| LBA_RS04450 | GlsB/YeaQ/YmgE family stress response membrane protein CDS | 2.06          | 4.75E-270  |
| LBA_RS04455 | CsbD family protein CDS                                    | 2.17          | 2.41E-256  |

**Venn Diagram**

| Names      | total | locus_tag   |
|------------|-------|-------------|
| CA GCA TCA | 1     | LBA_RS07885 |
| CA GCA     | 4     | LBA_RS09100 |
|            |       | LBA_RS04455 |
|            |       | LBA_RS04450 |
|            |       | LBA_RS09685 |
| CA TCA     | 1     | LBA_RS06090 |
| GCA        | 10    | LBA_RS08110 |
|            |       | LBA_RS08125 |
|            |       | LBA_RS08260 |
|            |       | LBA_RS07330 |
|            |       | LBA_RS05625 |
|            |       | LBA_RS08960 |
|            |       | LBA_RS07335 |
|            |       | LBA_RS08965 |

**GCA V MRS**

| locus_tag   | Name                                             | DE Log2 Ratio | DE p-value |
|-------------|--------------------------------------------------|---------------|------------|
| LBA_RS09100 | glycoside hydrolase family 65 protein CDS        | -2.51         | 2.28E-126  |
| LBA_RS07885 | DUF1542 domain-containing protein CDS            | -2.34         | 0          |
| LBA_RS05625 | putative sulfate exporter family transporter CDS | 2.10          | 6.52E-153  |

|             |                                                            |      |           |             |
|-------------|------------------------------------------------------------|------|-----------|-------------|
| LBA_RS08125 | hypothetical protein CDS                                   | 2.28 | 3.52E-22  | LBA_RS09690 |
| LBA_RS08110 | LPXTG cell wall anchor domain-containing protein CDS       | 2.41 | 8.44E-237 | LBA_RS08970 |
| LBA_RS08970 | TetR/AcrR family transcriptional regulator CDS             | 2.48 | 7.14E-264 |             |
| LBA_RS08960 | ABC transporter ATP-binding protein CDS                    | 2.59 | 0         |             |
| LBA_RS08965 | ABC transporter permease CDS                               | 2.60 | 0         |             |
| LBA_RS09685 | cell surface protein CDS                                   | 3.60 | 2.19E-126 |             |
| LBA_RS09690 | choice-of-anchor A family protein CDS                      | 3.74 | 1.37E-155 |             |
| LBA_RS07330 | fibrinogen-binding protein CDS                             | 3.80 | 6.39E-83  |             |
| LBA_RS08260 | calcium-translocating P-type ATPase, PMCA-type CDS         | 4.21 | 0         |             |
| LBA_RS04450 | GlsB/YeaQ/YmgE family stress response membrane protein CDS | 4.30 | 0         |             |
| LBA_RS04455 | CsbD family protein CDS                                    | 4.37 | 0         |             |
| LBA_RS07335 | LPXTG cell wall anchor domain-containing protein CDS       | 4.71 | 0         |             |

**TCA V MRS**

| locus_tag   | Name                                  | DE Log2 Ratio | DE p-value |
|-------------|---------------------------------------|---------------|------------|
| LBA_RS07885 | DUF1542 domain-containing protein CDS | -2.99         | 0          |
| LBA_RS06090 | FAD-dependent oxidoreductase CDS      | -2.62         | 1.77E-241  |

**L. gasseri wild type**

**CA V MRS**

| locus_tag    | Name                                                  | DE Log2 Ratio | DE p-value |
|--------------|-------------------------------------------------------|---------------|------------|
| LGAS_RS01970 | hypothetical protein CDS                              | -3.17         | 2.85E-57   |
| LGAS_RS08330 | FtsX-like permease family protein CDS                 | -2.31         | 5.00E-55   |
| LGAS_RS08285 | L,D-transpeptidase family protein CDS                 | 2.09          | 1.49E-139  |
| LGAS_RS08165 | cation:dicarboxylase symporter family transporter CDS | 2.09          | 0          |
| LGAS_RS08140 | YSIRK-type signal peptide-containing protein CDS      | 2.14          | 3.41E-136  |
| LGAS_RS08290 | D-alanyl-D-alanine carboxypeptidase CDS               | 2.21          | 3.50E-66   |
| LGAS_RS07675 | adhE CDS                                              | 2.42          | 0          |
| LGAS_RS08145 | hypothetical protein CDS                              | 2.88          | 1.05E-185  |

**Venn Diagram**

| Names      | total | locus_tag                                                                                                    |
|------------|-------|--------------------------------------------------------------------------------------------------------------|
| CA GCA TCA | 1     | LGAS_RS02675                                                                                                 |
| GCA TCA    | 1     | LGAS_RS05250                                                                                                 |
| CA         | 7     | LGAS_RS08145<br>LGAS_RS08165<br>LGAS_RS08140<br>LGAS_RS08290<br>LGAS_RS01970<br>LGAS_RS08330<br>LGAS_RS08285 |

**GCA V MRS**

| locus_tag    | Name                                                 | DE Log2 Ratio | DE p-value |
|--------------|------------------------------------------------------|---------------|------------|
| LGAS_RS05250 | LPXTG cell wall anchor domain-containing protein CDS | -2.27         | 1.53E-165  |
| LGAS_RS07675 | adhE CDS                                             | 2.25          | 4.04E-231  |

**TCA V MRS**

| locus_tag    | Name                                                 | DE Log2 Ratio | DE p-value |
|--------------|------------------------------------------------------|---------------|------------|
| LGAS_RS05250 | LPXTG cell wall anchor domain-containing protein CDS | -2.10         | 4.50E-296  |
| LGAS_RS07675 | adhE CDS                                             | 2.56          | 0          |

**L. gasseri ΔbshAB**

**CA V MRS**

| locus_tag    | Name                                                       | DE Log2 Ratio | DE p-value |
|--------------|------------------------------------------------------------|---------------|------------|
| LGAS_RS08330 | FtsX-like permease family protein CDS                      | -4.63         | 0          |
| LGAS_RS08335 | ABC transporter ATP-binding protein CDS                    | -4.45         | 0          |
| LGAS_RS01970 | hypothetical protein CDS                                   | -3.64         | 3.00E-98   |
| LGAS_RS05435 | hypothetical protein CDS                                   | -3.36         | 0          |
| LGAS_RS05440 | ABC transporter ATP-binding protein CDS                    | -3.25         | 0          |
| LGAS_RS05445 | GntR family transcriptional regulator CDS                  | -3.11         | 6.69E-224  |
| LGAS_RS05430 | hypothetical protein CDS                                   | -3.09         | 3.82E-284  |
| LGAS_RS02730 | DNA starvation/stationary phase protection protein CDS     | -2.49         | 1.33E-233  |
| LGAS_RS00380 | iron-sulfur cluster biosynthesis family protein CDS        | -2.27         | 4.34E-219  |
| LGAS_RS08315 | hypothetical protein CDS                                   | -2.26         | 1.13E-31   |
| LGAS_RS00160 | GlsB/YeaQ/YmgE family stress response membrane protein CDS | -2.13         | 1.41E-192  |
| LGAS_RS02735 | hypothetical protein CDS                                   | -2.10         | 2.70E-98   |
| LGAS_RS02410 | uracil transporter CDS                                     | -2.09         | 8.97E-174  |
| LGAS_RS04770 | FAD-dependent oxidoreductase CDS                           | -2.01         | 3.99E-133  |
| LGAS_RS08145 | hypothetical protein CDS                                   | 3.01          | 2.59E-120  |
| LGAS_RS05345 | carB CDS                                                   | 2.83          | 1.04E-299  |
| LGAS_RS05350 | carA CDS                                                   | 2.82          | 9.34E-161  |
| LGAS_RS05355 | dihydroorotase CDS                                         | 2.79          | 1.59E-136  |
| LGAS_RS05380 | orotate phosphoribosyltransferase CDS                      | 2.72          | 9.69E-133  |
| LGAS_RS05375 | pyrF CDS                                                   | 2.69          | 9.59E-123  |
| LGAS_RS05360 | aspartate carbamoyltransferase CDS                         | 2.53          | 1.16E-80   |
| LGAS_RS05340 | pyrR CDS                                                   | 2.46          | 4.63E-95   |
| LGAS_RS05370 | dihydroorotate dehydrogenase CDS                           | 2.42          | 2.17E-120  |

**Venn Diagram**

| Names      | total | locus_tag                                                                                                                                                                                                                                                                                                                    |
|------------|-------|------------------------------------------------------------------------------------------------------------------------------------------------------------------------------------------------------------------------------------------------------------------------------------------------------------------------------|
| CA GCA TCA | 1     | LGAS_RS02410                                                                                                                                                                                                                                                                                                                 |
| CA TCA     | 1     | LGAS_RS08145                                                                                                                                                                                                                                                                                                                 |
| GCA TCA    | 2     | LGAS_RS05250<br>LGAS_RS02575                                                                                                                                                                                                                                                                                                 |
| CA         | 23    | LGAS_RS08140<br>LGAS_RS05340<br>LGAS_RS02730<br>LGAS_RS04770<br>LGAS_RS00160<br>LGAS_RS08315<br>LGAS_RS05440<br>LGAS_RS05370<br>LGAS_RS00380<br>LGAS_RS08330<br>LGAS_RS05360<br>LGAS_RS05435<br>LGAS_RS05375<br>LGAS_RS08335<br>LGAS_RS01970<br>LGAS_RS05380<br>LGAS_RS05350<br>LGAS_RS05430<br>LGAS_RS02735<br>LGAS_RS05345 |

|                  |                                                      |       |           |     |     |                |
|------------------|------------------------------------------------------|-------|-----------|-----|-----|----------------|
| LGAS_RS09250     | APC family permease CDS                              | 2.13  | 4.33E-204 |     |     | LGAS_RS05445   |
| LGAS_RS08140     | YSIRK-type signal peptide-containing protein CDS     | 2.07  | 6.63E-106 |     |     | LGAS_RS09250   |
|                  |                                                      |       |           |     |     | LGAS_RS05355   |
| <b>GCA V MRS</b> |                                                      |       |           |     | GCA | 1 LGAS_RS02395 |
| LGAS_RS02410     | uracil transporter CDS                               | -3.80 | 0         | TCA |     | 1 LGAS_RS07675 |
| LGAS_RS02575     | MFS transporter CDS                                  | -2.77 | 0         |     |     |                |
| LGAS_RS05250     | LPXTG cell wall anchor domain-containing protein CDS | -2.29 | 0         |     |     |                |
| LGAS_RS02395     | Cof-type HAD-IIB family hydrolase CDS                | -2.13 | 2.85E-44  |     |     |                |
| <b>TCA V MRS</b> |                                                      |       |           |     |     |                |
| LGAS_RS02410     | uracil transporter CDS                               | -3.61 | 0         |     |     |                |
| LGAS_RS02575     | MFS transporter CDS                                  | -2.76 | 0         |     |     |                |
| LGAS_RS05250     | LPXTG cell wall anchor domain-containing protein CDS | -2.07 | 1.78E-251 |     |     |                |
| LGAS_RS07675     | adhE CDS                                             | 2.05  | 3.80E-254 |     |     |                |
| LGAS_RS08145     | hypothetical protein CDS                             | 2.02  | 4.52E-53  |     |     |                |

**Table S1. Table of differentially regulated *Lactobacillus* genes**

| <b>Strains:</b>              | <b>Details</b>                                                                                           | <b>Reference</b>             |
|------------------------------|----------------------------------------------------------------------------------------------------------|------------------------------|
| <b><i>E. coli</i></b>        |                                                                                                          |                              |
| EC101                        | RepA+ JM101; repA from pWV01 integrated in chromosome; cloning host for pORI-based plasmids              | Law et al 1995               |
| EC1000                       | RepA+ MC1000, repA from pWV01 integrated in chromosome; cloning host for pORI-based plasmids             | Leenhouts et al 1996         |
| NCK1391                      | Host for pTRK669                                                                                         | Russell and Klaenhammer 2001 |
| NCK1911                      | Host for pTRK935                                                                                         | Goh et al 2009               |
| NCK2519                      | Host for pTRK1123 (EC1000)                                                                               | this study                   |
| NCK2520                      | Host for pTRK1124 (EC1000)                                                                               | this study                   |
| NCK2714                      | Host for pTRK1206 (EC101)                                                                                | this study                   |
| NCK2715                      | Host for pTRK1207 (EC101)                                                                                | this study                   |
| <b><i>L. acidophilus</i></b> |                                                                                                          |                              |
| NCK1909                      | $\Delta upp$ (control strain; background strain for <i>upp</i> -based counterselective gene replacement) | Goh et al 2009               |
| NCK1910                      | NCK1909 harboring pTRK669; host for pORI-based counterselective integration plasmids                     | Goh et al 2009               |
| NCK2521                      | NCK1909 with $\Delta bshA$                                                                               | this study                   |
| NCK2522                      | NCK1909 with $\Delta bshB$                                                                               | this study                   |
| NCK2523                      | NCK1909 with $\Delta bshA$ and $\Delta bshB$                                                             | this study                   |
| <b><i>L. gasseri</i></b>     |                                                                                                          |                              |
| NCK2253                      | $\Delta upp$ (control strain; background strain for <i>upp</i> -based counterselective gene replacement) | Selle et al 2014             |
| NCK2254                      | NCK2253 harboring pTRK669; host for pORI-based counterselective integration plasmids                     | Selle et al 2014             |
| NCK2678                      | NCK2253 with $\Delta bshA$                                                                               | this study                   |
| NCK2679                      | NCK2253 with $\Delta bshB$                                                                               | this study                   |
| NCK2680                      | NCK2253 with $\Delta bshA$ and $\Delta bshB$                                                             | this study                   |
| <b>Plasmids:</b>             |                                                                                                          |                              |
| pTRK669                      | Ori (pWV01), RepA+                                                                                       | Russell and Klaenhammer 2001 |
| pTRK935                      | Counterselective integration vector with a <i>upp</i> expression cassette                                | Goh et al 2009               |
| pTRK1123                     | pTRK935-based plasmid with flanking regions to facilitate deletion of <i>bshA</i> from NCK1909           | this study                   |
| pTRK1124                     | pTRK935-based plasmid with flanking regions to facilitate deletion of <i>bshB</i> from NCK1909           | this study                   |
| pTRK1206                     | pTRK935-based plasmid with flanking regions to facilitate deletion of <i>bshA</i> from NCK2253           | this study                   |
| pTRK1207                     | pTRK935-based plasmid with flanking regions to facilitate deletion of <i>bshB</i> from NCK2253           | this study                   |
| pETite-LaBSHa                | pETite C-his plasmid containing LaBSHa                                                                   | this study                   |
| pETite-LaBSHb                | pETite C-his plasmid containing LaBSHb                                                                   | this study                   |
| pETite-LgBSHa                | pETite C-his plasmid containing LgBSHa                                                                   | this study                   |
| pETite-LgBSHb                | pETite C-his plasmid containing LgBSHb                                                                   | this study                   |

**Table S2. Strains and plasmids used in this study**



| <b>Primer name</b>           | <b>Primer sequence (5' to 3')</b>                           |
|------------------------------|-------------------------------------------------------------|
| <b><i>L. acidophilus</i></b> |                                                             |
| La_BshA_SOEA_F               | GATCGGATCCGATGGAACGATTCCCCTTCC                              |
| La_BshA_SOEA_R               | GGGACTGAATATAAATTGATGTACACAT                                |
| La_BshA_SOEB_F               | GTACATCAATTATATTCAGTCCCCATCAAAAACAAAAACAATTC                |
| La_BshA_SOEB_R               | GATCGAGCTCCATCTGAAGGATAATGTGC                               |
| La_BshB_SOEA_F               | GATCGGATCCGAAGGATCTGATGCTGATGCGAG                           |
| La_BshB_SOEA_R               | TGATGTACACATTTACTGCACGC                                     |
| La_BshB_SOEB_F               | CGTGCAGTAAATGTGTACATCAGAATATATGAATTAATTTATATAC              |
| La_BshB_SOEB_R               | GATCGAGCTCGGATGATACGAATTAGTGAGATAAGTACC                     |
| La_Scr_BshA_F                | CAAGCTTACAATCATGACAAAGG                                     |
| La_Scr_BshA_R                | GGAACCACTTGCTAAGGCAC                                        |
| La_Scr_BshB_F                | GCGCATGCTATTGCAAATAGTG                                      |
| La_Scr_BshB_R                | CTGATAGGCGAACACATCCGTG                                      |
| <b><i>L. gasseri</i></b>     |                                                             |
| Lg_BshA_SOEA_F               | GATCGGATCCCGTCGTTTCTGATGCTGAATTAGCTG                        |
| Lg_BshA_SOEA_R               | CTTAAACCAGTACACATTTTAAAAATCCCTCC                            |
| Lg_BshA_SOEB_F               | GGATTTTAAAAATGTGTACTGGTTTAAAGTTAGACGATGAAACGATGAACGCTGAC    |
| Lg_BshA_SOEB_R               | GATCGAGCTCGCACTAGGAATTTTCAGTAGTGGC                          |
| Lg_BshB_SOEA_F               | GATCGGATCCAGACTACCTACTTGACGCGAG                             |
| Lg_BshB_SOEA_R               | TGATGTACACATATTAGATTTCTCCTC                                 |
| Lg_BshB_SOEB_F               | GAAATCTAATATGTGTACATCAAGTTTATAAAATTAATAATTAGCTAGAAATTTGTATC |
| Lg_BshB_SOEB_R               | GATCGAGCTCCTGCTTCAAACCTTGAATGCG                             |
| Lg_Scr_BshA_F                | CACTTGACCTCAATGGCACC                                        |
| Lg_Scr_BshA_R                | CGCTTTCATGACATATATTC                                        |
| Lg_Scr_BshB_F                | CATCTTGATTGACGAAGGAAC                                       |
| Lg_Scr_BshB_R                | CGACATTGGTTAATTGAAAGTTATC                                   |
| <b>Plasmid</b>               |                                                             |
| upp_ScF                      | GGGCTGGCTTAACTATGC                                          |
| upp_ScR                      | CTTCCGGCTCGTATGTTG                                          |

\* Restriction sites are shown in bold

**Rosetta *E. coli***

|          |                                                               |
|----------|---------------------------------------------------------------|
| LaBSHa F | GAAGGAGATATACATATGTGTACATCAATTATATTCAGTCCCAAAGATCATTAC        |
| LaBSHa R | GTGATGGTGGTGATGATGGTTTTGATGGTTAAATTTAGTTTTATCAAGCATATCATAAGTG |
| LaBSHb F | GAAGGAGATATACATATGTGTACCAGCATCTGTTATAATCCAAATGACC             |
| LaBSHb R | GTGATGGTGGTGATGATG GTTCATATACTCAATGTCTTGTTCCTTAAAAAGATCATAGCA |
| LgBSHa F | GAAGGAGATATACATATGTGTACTGGTTTAAAGATTACAGATGATCAAGG            |
| LgBSHa R | GTGATGGTGGTGATGATGATAGGTGATTAGCTTGCAGCGTTCATCG                |
| LgBSHb F | GAAGGAGATATACATATGTGTACATCAATTTATATAGTCCCAAAGACCAC            |
| LgBSHb R | GTGATGGTGGTGATGATGATTTATAAAAATAATATCCTGTTTCTTGAACAAGTCAAACACG |

**Synthesized Genes**

ATG TGT ACC AGC ATC TGT TAT AAT CCA AAT GAC CAT TAT TTC GGT CGT AAT CTT GAT TAT GAA  
ATT GCC TAC GGG CAA AAA GTT GTA ATT GTA CCG CGT AAC TAT GAG TTT AAG TAT CGT GAG  
ATG CCT AGT CAG AAA ATG CAC TAC GCC TTT ATT GGT GTC AGT GTT GTC AAC GAT GAC TAC CCC  
CTG CTG TGT GAC GCC ATT AAC GAG AAG GGC CTT GGA ATT GCG GGA TTG AAC TTT CAG GGT  
CCC AAT CAT TAC TTC CCG AAG ATC GAA GGG AAA AAA AAT ATT GCG TCG TTC GAG CTG ATG  
CCT TAC TTA CTG TCA AAT TGT GAA AAT ACA GAC GAC GTT AAA GAA ATC CTT GAC AAC GCC  
AAC ATC TTG AAC ATC AGT TTC AGC GCT AAC TAC CCC GCC GCT GAT CTG CAT TGG ATT CTT TCT  
GAT AAA GCC GGC AAA AGC ATC GTA GTC GAA TCC ACG AAT AGC GGG CTG CAT ATT TAC GAC  
AAC CCA GTT AAT GTC TTG ACG AAC AAC CCT GAG TTC CCT GAC CAG TTG ATT AAG TTG TCA GAT  
TAT GCC GAC GTG ACT CCA CAC AAC CCC AAG AAT ACT CTG GTT CCA AAT GTT GAC CTT AAT TTA  
TAC AGC CGT GGT CTT GGC ACA CAT CAC TTA CCC GGT GGG ATG GAT TCA TCC TCC CGT TTC GTG  
AAA GTC GCG TTC GTT CTG GCC CAC ACA CCT CAA GGG AAG AAC GAA GTT GAG AAT GTT ACA  
AAT TAT TTT CAC ATT CTG CAT AGT GTT GAG CAA CCC GAC GGC TTG GAC GAG GTT GAG GAC  
AAT CGT TAT GAA TAT ACG ATG TAC ACT GAT TGC ATG AAC CTT GAT AAA GGC ATT CTT TAT TTC  
ACA ACT TAT GAC AAT AAT CGT ATC AAT GCA GTT GAT ATG CAT AAA GCT GAT CTT GAC TCG  
Codon optimized sequence of LaBSHb GAG GAC CTG ATT TGC TAT GAT CTT TTT AAG AAA CAA GAC ATT GAG TAT ATG AAC

**Table S3. Oligonucleotides used in this study**

## Table S2 References

1. Law J, *et al.* (1995) A system to generate chromosomal mutations in *Lactococcus lactis* which allows fast analysis of targeted genes. *J Bacteriol* 177(24):7011-7108.
2. Leenhouts K, *et al.* (1996) A general system for generating unlabelled gene replacements in bacterial chromosomes. *Mol Gen Genet* 253(1-2):217-224.
3. Russell WM, Klaenhammer TR, (2009) Efficient system for directed integration into the *Lactobacillus acidophilus* and *Lactobacillus gasseri* chromosomes via homologous recombination. *Appl Environ Microbiol* 67(9):4361-4364.
4. Goh YJ, *et al.* (2009) Development and application of a upp-based counterselective gene replacement system for the study of the S-layer protein SlpX of *Lactobacillus acidophilus* NCFM. *Appl Environ Microbiol* 75(10):3093-3105.
5. Selle K, *et al.* (2014) Development of an integration mutagenesis system in *Lactobacillus gasseri*. *Gut Microbes* 5(3):326-323.
